# Supplementary material for: Silver-ion-passivated black phosphorus photodetectors to improve the response time
Source: Royal Society of Chemistry journal article supplement (doi:10.1039/d3nj00470h), 2023-01-01
Supplement: d3nj00470h1.pdf [file d3nj00470h1.pdf]

## Silver-Ion-Passivated Black Phosphorus Photodetector to Improve Response Time

Huilin Zuo<sup>1§</sup>, Jing Bai<sup>2§</sup>, Chenglin Wang<sup>1</sup>, Junhao Ni<sup>1</sup>, Yang Ding<sup>1</sup>, Bingyu Pan<sup>1</sup>, Zhengyang Cai<sup>1</sup>, Shaoqing Xiao<sup>1</sup>, Xiaofeng Gu<sup>1</sup>, Xiumei Zhang<sup>3\*</sup>, Haiyan Nan<sup>1\*</sup>

<sup>1</sup> Engineering Research Center of IoT Technology Applications (Ministry of Education) Department of Electronic Engineering, Jiangnan University, China

<sup>2</sup> Department of Foundation, Army Engineering University of PLA, China

<sup>3</sup> School of Science, Jiangnan University, China

§ contributed equally to this article

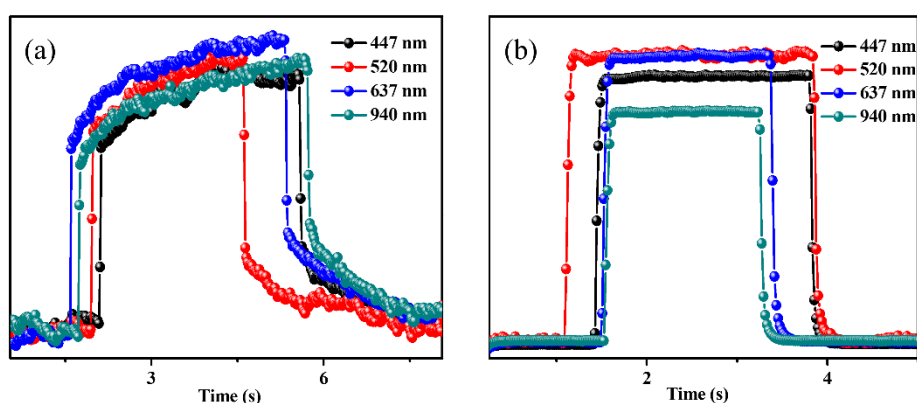

Figure S1. Transient response of as-prepared (a) and Ag<sup>+</sup> decorated BP photodetector upon laser illumination at different wavelengths. It can be seen that the response time at each wavelength increases significantly.

Table 1 Comparison of different methods and performance to improve the stability of black phosphorus.

| type                                  | method                                        | response time               | hysteresis | mobility                                            | Ref. |
|---------------------------------------|-----------------------------------------------|-----------------------------|------------|-----------------------------------------------------|------|
| Gr-BP/Gr                              | covered hexagonal boron nitride (hBN)         | $t_r=1.8$ ns, $t_f=1.68$ ns | /          | /                                                   | 1    |
| BP/MoS <sub>2</sub> /arsenic-doped BP | encapsulated in hexagonal boron nitride (hBN) | $t_r=35$ ns, $t_f=40$ ns    | /          | /                                                   | 2    |
| BP FET                                | dope with tellurium (Te)                      | /                           | /          | 1850cm <sup>2</sup> V <sup>-1</sup> s <sup>-1</sup> | 3    |
| BP FET                                | metal-ion-modified                            | /                           | /          | 1666cm <sup>2</sup> V <sup>-1</sup> s <sup>-1</sup> | 4    |
| BP FET                                | scalable superhydrophobic passivation layer   | /                           | /          | 572cm <sup>2</sup> V <sup>-1</sup> s <sup>-1</sup>  | 5    |
| Au/FL-BP based nano-devices           | electrochemically deposited Au nanoparticles  | $t_r=47$ ms, $t_f=30$ ms    | /          | ~45cm <sup>2</sup> V <sup>-1</sup> s <sup>-1</sup>  | 6    |
| BP FET                                | SiO <sub>2</sub> passivation                  | /                           | /          | 524.3cm <sup>2</sup>                                | 7    |

|                  |                    |                            |                    |                            |          |
|------------------|--------------------|----------------------------|--------------------|----------------------------|----------|
|                  |                    |                            |                    | $V^{-1} s^{-1}$            |          |
| BP photodetector | $Ag^+$ passivation | $t_r=50ms$ ,<br>$t_f=80ms$ | from 85.6V to 29 V | $844.12cm^2 V^{-1} s^{-1}$ | Our work |

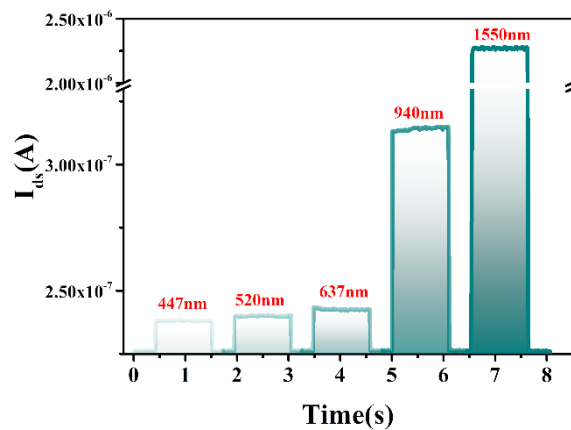

Figure S2. The response performance of a BP( $Ag^+$ ) photodetector is measured when illuminated by a laser at wavelengths of 447 nm, 520 nm, 637 nm, 940 nm and 1550nm.

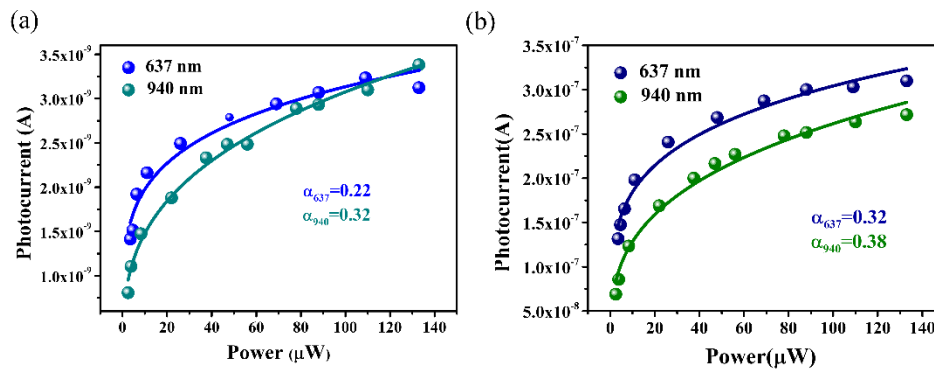

Figure S3. Photocurrent as a function of the light intensity for 637 nm and 940 nm before (a) and after  $AgNO_3$  solution soaking (b). It was observed that for 637 nm laser, the coefficient of  $\alpha$  increased from 0.22 to 0.32, and for 940 nm laser, the coefficient of  $\alpha$  increased from 0.32 to 0.38.

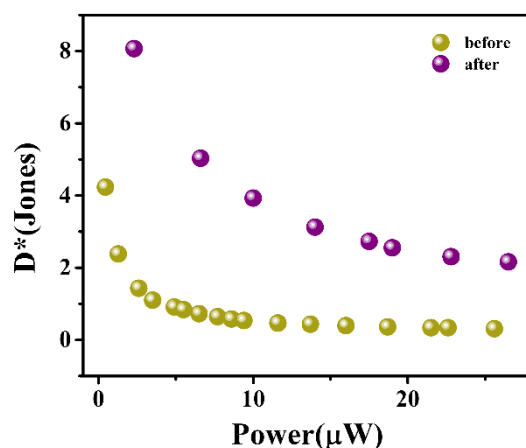

Figure S4. Dependence of the detectivity of the BP detector on the incident light power at 447 nm.

## Reference

1. T.-Y. Chang, P.-L. Chen, J.-H. Yan, W.-Q. Li, Y.-Y. Zhang, D.-I. Luo, J.-X. Li, K.-P. Huang and C.-H. Liu, *ACS Applied Materials & Interfaces*, 2019, 12, 1201-1209.
2. T. Y. Chang, P. L. Chen, P. S. Chen, W. Q. Li, J. X. Li, M. Y. He, J. T. Chao, C. H. Ho and C. H. Liu, *ACS Appl Mater Interfaces*, 2022, 14, 32665-32674.
3. B. Yang, B. Wan, Q. Zhou, Y. Wang, W. Hu, W. Lv, Q. Chen, Z. Zeng, F. Wen, J. Xiang, S. Yuan, J. Wang, B. Zhang, W. Wang, J. Zhang, B. Xu, Z. Zhao, Y. Tian and Z. Liu, *Adv Mater*, 2016, 28, 9408-9415.
4. Z. Guo, S. Chen, Z. Wang, Z. Yang, F. Liu, Y. Xu, J. Wang, Y. Yi, H. Zhang, L. Liao, P. K. Chu and X. F. Yu, *Adv Mater*, 2017, 29.
5. B. Jiang, H. Huang, R. Chen, G. Li, D. Flandre, D. Wan, X. Chen, X. Liu, C. Ye and L. Liao, *Applied Physics Letters*, 2020, 117.
6. N. Wang, H. Liu, X. Zhou, Q. Luo, X. Yang, H. Yang, H. Shu, H. Xu, Q. Zhang, D. Hildebrandt, X. Liu, S. Qiao, B. Liu and Q. Feng, *Advanced Functional Materials*, 2022, 32.
7. B. Wan, B. Yang, Y. Wang, J. Zhang, Z. Zeng, Z. Liu and W. Wang, *Nanotechnology*, 2015, 26, 435702.
